# Supplementary material
Source: Springer Nature journal article supplement (https://www.springermedizin.de/resource/supplementary/13049_2009_165_MOESM2_ESM.pdf/9666012)

# Survival Plot (PL estimates)

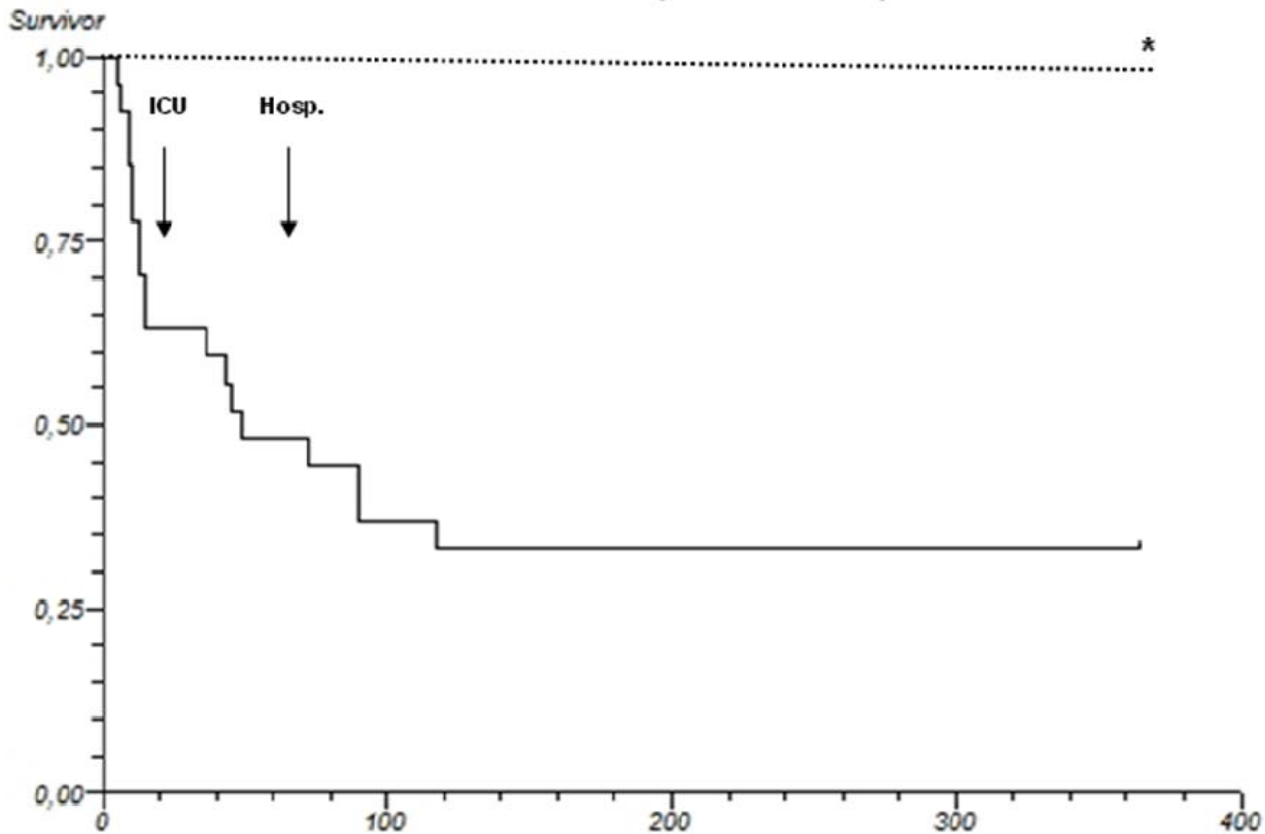

Time after ICU admission (days)

\* Age-matched P of Death

Supplement: MOESM2 [file 9666012]
